# Supplementary material for: Metabolic networks in a porcine model of trauma and hemorrhagic shock demonstrate different control mechanism with carbohydrate pre-feed
Source: Springer Nature journal article supplement (doi:10.1186/s12873-015-0038-1), 2015-06-30
Supplement: MOESM2 [file 9737114]

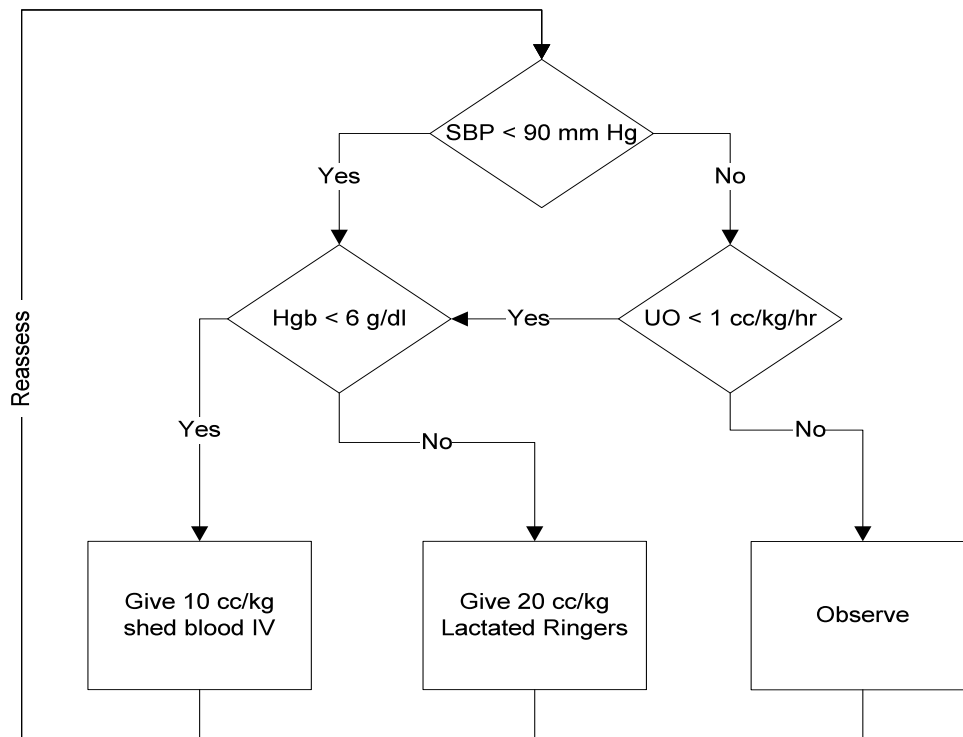

**Supplemental Figure 1:** Resuscitation algorithm used for shocked, resuscitated animals (Fasted and Pre-fed groups). If SBP is observed to be less than 90 mmHg, hemoglobin (Hgb) levels are assessed. If hemoglobin is low, shed blood is given; if not, lactated Ringers are given. Alternately, if SBP is not less than 90 mmHg, urine output (UO) is assessed. If urine output is low, the algorithm proceeds according to hemoglobin levels as described. If urine output is adequate, the animal is observed and reassessed for the full resuscitation period.
