# Supplementary material for: Metabolic networks in a porcine model of trauma and hemorrhagic shock demonstrate different control mechanism with carbohydrate pre-feed
Source: Springer Nature journal article supplement (doi:10.1186/s12873-015-0038-1), 2015-06-30
Supplement: MOESM3 [file 9737114]

## SUPPLEMENTARY MATERIAL

### 1. METABOLITE NETWORK ANALYSIS

The network analysis is based on the method of [1]. The following data analysis is performed separately for the fasted group and the fed group. Each set of data contains 48 metabolites measured at a baseline, and 6 sampling times, measured in hours after hemorrhage. The baseline is denoted time  $t_0 = 0$ , and the other sampling times are  $\{t_k\}_{k=1}^6 = \{0.75, 3, 5, 9, 17, 21\}$  as described in Table 1 of the manuscript.

- Let  $x_\ell(k)$  be the data for Metabolite  $\ell$  at sample time  $t_k$ .
- Pre-processing:
  - The data is normalized as follows: For all  $\ell$ , set

$$\bar{x}_\ell(k) = \frac{x_\ell(k)}{\sqrt{\sum_{k=0}^6 x_\ell^2(k)}}$$

- The data is shifted so that the baseline measurement is 0 as follows:

$$\tilde{x}_\ell(k) = \bar{x}_\ell(k) - \bar{x}_\ell(0)$$

- Regression Matrix: The data from all metabolites is placed into a matrix, with each column a different metabolite, and each row a different sampling time, starting after hemorrhage and continuing until the 5th sample.

$$A = \begin{bmatrix} \tilde{x}_1(1) & \tilde{x}_2(1) & \cdots & \tilde{x}_{48}(1) \\ \tilde{x}_1(2) & \tilde{x}_2(2) & \cdots & \tilde{x}_{48}(2) \\ \vdots & \vdots & \ddots & \vdots \\ \tilde{x}_1(5) & \tilde{x}_2(5) & \cdots & \tilde{x}_{48}(5) \end{bmatrix}$$

- For  $n = 1$  to 48:
  - The metabolite  $n$  is chosen as the “controlled node”. The data that is to be predicted is the change in this metabolite from one sample to the next. This is denoted by  $\Delta\tilde{x}_n(k)$ , where  $\Delta\tilde{x}_n(k) = (\tilde{x}_n(k+1) - \tilde{x}_n(k)) / (t_{k+1} - t_k)$ . Since there are 6 samples, we can calculate  $\Delta\tilde{x}_n(k)$  for  $k = 1, \dots, 5$ . Set

$$y = \begin{bmatrix} \Delta\tilde{x}_n(1) \\ \Delta\tilde{x}_n(2) \\ \vdots \\ \Delta\tilde{x}_n(5) \end{bmatrix}$$

- The following re-weighted regularized optimization is used to select regressors and weights that best explain the rate of change of the metabolite concentration of the controlled node. The regularization  $\|Wz\|_1$  promotes sparsity in the solution, so that only a few elements of  $z$  will be non-zero. Select  $t = .95$ ,  $\delta = .001$  and length 48 vector  $w$  as  $w_i = 1$  for  $i = 1, \dots, 48$ . For  $j=1$  to 3, do the following

- \* Set  $W = \text{diag}(w)$ ,

$$\begin{aligned} \min_{z, \epsilon} \quad & t\|Wz\|_1 + (1-t)\epsilon \\ \text{subject to} \quad & \|y - Az\|_2 \leq \epsilon \end{aligned}$$

where for length  $m$  vector  $x$ ,  $\|x\|_2 = \sqrt{\sum_{i=1}^m x_i^2}$ , and  $\|x\|_1 = \sum_{i=1}^m |x_i|$ .

- \* set

$$w(i) = \frac{\delta}{\delta + |z(i)|}$$

- Determine if  $\epsilon < \frac{1}{2}(\|y_{i_1}\|_2 + \|y_{i_2}\|_2 + \dots + \|y_{i_m}\|_2)$ . If so, this is noted as a potentially interesting node. Find the indices  $i$  for which the weights  $|z(i)| > 0.1$  and denote the metabolites  $i$  as controlling node  $n$ .

## REFERENCES

- [1] Zavlanos, M.M., Julius, A.A., Boyd, S.P., Pappas, G.J.: Inferring stable genetic networks from steady-state data. *Automatica* **47**(6), 1113–1122 (2011)
